# Supplementary material for: Short-Term Changes in Aroma-Related Volatiles in Meat Model: Effect of Fat and D. hansenii Inoculation
Source: MDPI journal article supplement (doi:10.3390/foods12122429), 2023-06-20
Supplement: s1 [file s1]

## Short-term changes in aroma-related volatiles in meat model: Effect of fat and *D. hansenii* inoculation

Lei Li, Carmela Belloch, and Mónica Flores \*

**Figure S1.** Evolution of pH in the model systems. Data expressed as means  $\pm$  SE.

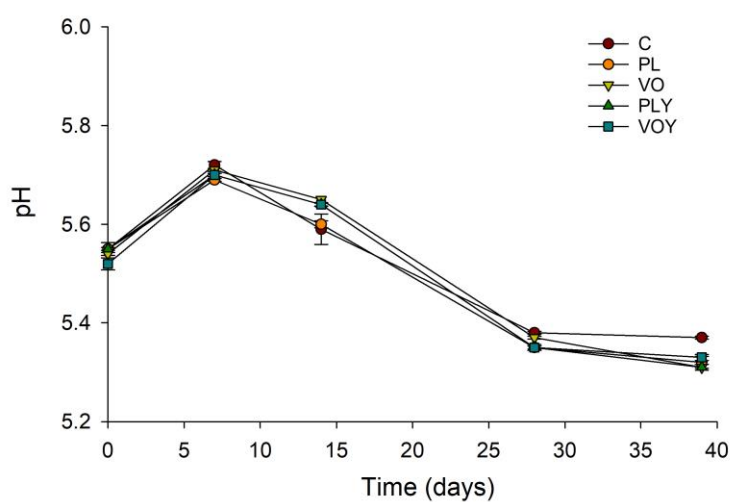

**Table S1.** The concentration of amino acids (mg/100 mL) in the model systems.

| Amino Acids  | Concentration<br>(mg/100 mL) | Amino Acids | Concentration<br>(mg/100 mL) | Amino Acids | Concentration<br>(mg/100 mL) | Amino Acids | Concentration<br>(mg/100 mL) |
|--------------|------------------------------|-------------|------------------------------|-------------|------------------------------|-------------|------------------------------|
| Ala          | 111.8                        | Thr         | 54.99                        | Glu         | 73.45                        | Tyr         | 26.98                        |
| Gly          | 42.58                        | Ser         | 19.24                        | Phe         | 83.85                        | Trp         | 17.03                        |
| Val          | 90.35                        | Pro         | 89.05                        | Gln         | 65                           | C-C         | 5.36                         |
| $\beta$ -Ala | 4.54                         | Asn         | 21.71                        | Orn         | 31.01                        | Arg         | 9.49                         |
| Leu          | 176.8                        | Asp         | 100.1                        | Lys         | 120.9                        | Cys         | 11.12                        |
| Ile          | 62.08                        | Met         | 36.27                        | His         | 38.48                        |             |                              |

**Table S2.** Volatile compounds detected in the model systems.

| N <sup>1</sup>                   | Compounds            | LRI <sup>2</sup> | LRI <sup>3</sup> | RI <sup>4</sup> | Meat model systems <sup>5</sup> |    |    |     |     |
|----------------------------------|----------------------|------------------|------------------|-----------------|---------------------------------|----|----|-----|-----|
|                                  |                      |                  |                  |                 | C                               | PL | VO | PLY | VOY |
| <i>Carbohydrate fermentation</i> |                      |                  |                  |                 |                                 |    |    |     |     |
|                                  | Acetaldehyde         | 467              | 466              | a               | + <sup>6</sup>                  | +  | +  | +   | +   |
| 1                                | Ethanol              | 508              | 507              | a               | +                               | +  | +  | +   | +   |
| 2                                | Acetone              | 530              | 527              | a               | +                               | +  | +  | +   | +   |
| 3                                | 2-Butanone           | 635              | 629              | a               | -                               | +  | +  | +   | +   |
| 4                                | Acetic acid          | 713              | 714              | a               | +                               | +  | +  | +   | +   |
| 5                                | 3-Hydroxy-2-butanone | 783              | 783              | a               | -                               | -  | +  | +   | +   |
| 6                                | Butanoic acid        | 888              | 891              | a               | -                               | -  | -  | +   | +   |
| <i>Lipid oxidation</i>           |                      |                  |                  |                 |                                 |    |    |     |     |
|                                  | Pentane              | 500              | 500              | a               | +                               | +  | +  | +   | +   |
|                                  | Hexane               | 600              | 600              | a               | +                               | +  | +  | +   | +   |
|                                  | Heptane              | 700              | 700              | a               | +                               | +  | +  | +   | +   |
|                                  | Pentanal             | 737              | 736              | a               | +                               | +  | +  | +   | +   |
|                                  | 2-Methylheptane      | 767              |                  | b               | +                               | +  | +  | +   | +   |
|                                  | 4-Methylheptane      | 768              |                  | b               | +                               | +  | +  | +   | +   |
|                                  | 3-Methylheptane      | 775              |                  | b               | +                               | +  | +  | +   | +   |
|                                  | Octane               | 800              | 800              | a               | +                               | +  | +  | +   | +   |
|                                  | 2,4-Dimethylheptane  | 823              |                  | b               | -                               | +  | -  | -   | +   |
| 7                                | 1-Pentanol           | 826              | 823              | a               | +                               | -  | +  | -   | +   |
| 8                                | Hexanal              | 841              | 839              | a               | +                               | +  | +  | +   | +   |
| 9                                | 1-Hexanol            | 924              | 921              | a               | +                               | +  | +  | +   | +   |
| 10                               | Heptanal             | 942              | 941              | a               | +                               | +  | +  | +   | +   |
| 11                               | 2-Pentylfuran        | 1009             | 1009             | a               | +                               | +  | +  | +   | +   |
| 12                               | Octanal              | 1048             | 1044             | a               | +                               | +  | +  | +   | +   |
| 13                               | Hexanoic acid        | 1080             | 1075             | a               | +                               | +  | +  | +   | +   |
| 14                               | 2-Ethyl-1-hexanol    | 1084             | 1083             | a               | +                               | +  | +  | -   | +   |
| 15                               | 1-Octanol            | 1126             | 1123             | a               | +                               | -  | -  | -   | -   |
| 16                               | Nonanal              | 1151             | 1148             | a               | +                               | +  | +  | +   | +   |
|                                  | Dodecane             | 1200             | 1200             | a               | -                               | -  | +  | -   | -   |
| 17                               | Nonanoic acid        | 1360             | 1350             | a               | -                               | -  | +  | -   | +   |
| 18                               | Octanoic acid        | 1269             | 1264             | a               | +                               | +  | +  | +   | +   |
| 19                               | n-Decanoic acid      | 1455             | 1451             | a               | +                               | +  | +  | +   | +   |
|                                  | Tetradecane          | 1399             | 1400             | a               | -                               | -  | +  | -   | +   |
|                                  | Pentadecane          | 1500             | 1500             | a               | -                               | -  | +  | -   | +   |
|                                  | Hexadecane           | 1600             | 1600             | a               | -                               | -  | +  | -   | -   |
| 20                               | Dodecanoic acid      | 1645             | 1645             | a               | -                               | -  | +  | -   | +   |
|                                  | Heptadecane          | 1700             | 1700             | a               | -                               | -  | +  | -   | -   |
| <i>Amino acid degradation</i>    |                      |                  |                  |                 |                                 |    |    |     |     |

|                                           |                                   |      |      |   |   |   |   |   |   |
|-------------------------------------------|-----------------------------------|------|------|---|---|---|---|---|---|
| 21                                        | 2-Methylpropanal                  | 594  | 590  | a | + | + | - | + | + |
| 22                                        | 3-Methylbutanal                   | 692  | 687  | a | + | + | + | + | + |
| 23                                        | 2-Methylbutanal (58) <sup>7</sup> | 701  | 698  | a | + | + | + | + | + |
| 24                                        | Dimethyl disulfide                | 771  | 774  | a | + | - | - | - | - |
| 25                                        | 3-Methyl-1-butanol                | 795  | 795  | a | + | + | + | + | + |
| 26                                        | 2-Methylbutanol                   | 798  | 795  | a | - | + | - | + | + |
| 27                                        | 2-Methylpropanoic acid            | 860  | 864  | a | - | - | - | + | + |
| 28                                        | 3-Methylbutanoic acid             | 939  | 933  | a | - | - | - | + | + |
| 29                                        | 2-Methylbutanoic acid             | 945  | 947  | a | - | - | - | + | - |
| 30                                        | Methional                         | 969  | 968  | a | + | + | - | + | + |
| 31                                        | Benzaldehyde                      | 1018 | 1013 | a | + | + | + | + | + |
|                                           | Benzeneacetaldehyde               | 1110 | 1104 | a | + | + | + | + | + |
| 32                                        | Phenylethyl alcohol               | 1195 | 1191 | a | - | - | - | + | + |
| <i>Esterase activity</i>                  |                                   |      |      |   |   |   |   |   |   |
| 33                                        | Ethyl acetate                     | 638  | 636  | a | + | + | + | + | + |
| 34                                        | Methyl hexanoate                  | 953  | 952  | a | - | - | + | - | + |
| 35                                        | Ethyl hexanoate                   | 1028 | 1026 | a | - | - | + | - | + |
| 36                                        | Ethyl octanoate                   | 1229 | 1226 | a | + | + | + | + | + |
| 37                                        | Ethyl decanoate                   | 1427 | 1421 | a | + | + | + | + | + |
| 38                                        | Ethyl dodecanoate                 | 1623 | 1623 | a | - | - | + | - | + |
| <i>Lipid <math>\beta</math>-oxidation</i> |                                   |      |      |   |   |   |   |   |   |
| 39                                        | 2-Pentanone                       | 733  | 731  | a | - | - | - | + | + |
| 40                                        | 2-Heptanone                       | 935  | 933  | a | + | + | + | + | + |
|                                           | 2,3-Octanedione                   | 1028 | 1029 | a | + | - | - | - | + |
| 41                                        | 1-Octen-3-ol                      | 1030 | 1028 | a | + | + | + | + | + |
| <i>Unknown origin</i>                     |                                   |      |      |   |   |   |   |   |   |
|                                           | Carbon disulfide                  | 538  | 532  | a | + | + | + | + | + |
| 42                                        | <i>p</i> -Xylene                  | 892  | 892  | a | + | + | + | + | + |
| 43                                        | Styrene                           | 920  | 921  | a | + | + | + | + | + |
|                                           | 3-Carene                          | 1021 | 1026 | a | + | + | + | + | + |
|                                           | D-Limonene                        | 1044 | 1046 | a | + | - | + | + | + |

<sup>1</sup> Compounds quantified in the meat model systems.

<sup>2</sup> Linear retention indices (LRI) of the compounds eluted from the GC-MS using a DB-624 capillary column (J & W Scientific 30 m  $\times$  0.25 mm i.d.  $\times$  1.4  $\mu$  m film thickness).

<sup>3</sup> Linear retention indices (LRI) of the authentic standard compounds.

<sup>4</sup> RI: reliability of identification: a, identification by mass spectrum and by coincidence with the LRI of an authentic standard; b, identification by mass spectrum.

<sup>5</sup> C: Control meat model system; PL and VO, pork lard and coconut oil model systems, respectively; PLY and VOY, pork lard and coconut oil model systems inoculated with yeast.

<sup>6</sup>+: detected; -: not detected.

<sup>7</sup> Target ion (m/z) used to quantify the compound when the peak was not completely resolved.

**Table S3.** Calibration curves, linearity and correlation coefficients of volatile compounds quantified in the model systems by HS-SPME.

| Compounds                        | Measure range<br>(ng) | Slope<br>(A/ng × 10 <sup>6</sup> ) | Intercept<br>(10 <sup>6</sup> ) | Correlation<br>coefficient (r <sup>2</sup> ) | LOD<br>(ng) | LOQ<br>(ng) |
|----------------------------------|-----------------------|------------------------------------|---------------------------------|----------------------------------------------|-------------|-------------|
| <i>Carbohydrate fermentation</i> |                       |                                    |                                 |                                              |             |             |
| Ethanol                          | 304.40-15220          | 0.04                               | 28.49                           | 0.9967                                       | 0.00        | 0.00        |
| Acetone                          | 2.96-74               | 0.10                               | -0.02                           | 0.9991                                       | 0.00        | 0.00        |
| 2-Butanone                       | 0.78-195              | 0.26                               | 0.60                            | 0.9998                                       | 0.00        | 0.00        |
| Acetic acid                      | 3.90-78               | 0.43                               | -1.97                           | 0.9879                                       | 5.87        | 7.16        |
| 3-Hydroxy-2-butanone             | 9.60-240              | 0.16                               | -2.55                           | 0.9968                                       | 11.72       | 12.75       |
| Butanoic acid                    | 6.32-31.60            | 0.38                               | -1.41                           | 0.9981                                       | 4.98        | 7.03        |
| <i>Lipid oxidation</i>           |                       |                                    |                                 |                                              |             |             |
| 1-Pentanol                       | 1.18-11.8             | 0.61                               | -0.20                           | 0.996                                        | 0.00        | 0.00        |
| Hexanal                          | 1.88-470              | 0.39                               | 0.12                            | 0.9994                                       | 1.23        | 2.90        |
| 1-Hexanol                        | 1.32-16.5             | 1.13                               | -1.19                           | 0.9967                                       | 1.56        | 2.35        |
| Heptanal                         | 0.8-20                | 0.74                               | -0.56                           | 0.9991                                       | 1.07        | 1.53        |
| 2-Pentylfuran                    | 2.3-57.5              | 0.21                               | -0.80                           | 0.9915                                       | 0.00        | 0.00        |
| Octanal                          | 1.72-17.2             | 0.22                               | -0.32                           | 0.9941                                       | 0.00        | 0.00        |
| Hexanoic acid                    | 10.24-512             | 0.65                               | -9.98                           | 0.9968                                       | 16.09       | 16.39       |
| 2-Ethyl-1-hexanol                | 1.32-6.6              | 0.87                               | -0.78                           | 0.9951                                       | 0.00        | 0.00        |
| 1-Octanol                        | 4.1-41                | 1.47                               | -5.60                           | 0.9954                                       | 0.00        | 0.00        |
| Nonanal                          | 4.3-43                | 0.81                               | -2.05                           | 0.9994                                       | 2.81        | 3.14        |
| Nonanoic acid                    | 2.64-13.2             | 1.36                               | -3.69                           | 0.982                                        | 0.00        | 0.00        |
| Octanoic acid                    | 34.36-1718            | 0.53                               | -25.60                          | 0.9971                                       | 0.00        | 0.00        |
| n-Decanoic acid                  | 9.84-123              | 0.78                               | -7.19                           | 0.9984                                       | 0.00        | 0.00        |
| Dodecanoic acid                  | 21.6-216              | 0.51                               | -14.98                          | 0.982                                        | 32.13       | 34.41       |
| <i>Amino acid degradation</i>    |                       |                                    |                                 |                                              |             |             |
| 2-Methylpropanal                 | 1.56-39               | 0.13                               | -0.14                           | 0.9933                                       | 2.45        | 3.97        |
| 3-Methylbutanal                  | 0.88-22               | 0.41                               | 0.25                            | 0.9992                                       | 0.00        | 0.00        |

|                                           |            |      |       |        |       |       |
|-------------------------------------------|------------|------|-------|--------|-------|-------|
| 2-Methylbutanal (58) <sup>a</sup>         | 0.84-21    | 0.04 | -0.01 | 0.9997 | 0.00  | 0.00  |
| Dimethyl disulfide                        | 1.56-15.6  | 0.10 | -0.04 | 0.9958 | 1.71  | 2.59  |
| 3-Methyl-1-butanol                        | 1.84-46    | 0.54 | -1.11 | 0.9942 | 2.42  | 2.81  |
| 2-Methylbutanol                           | 1.11-11.41 | 1.06 | -0.05 | 0.9989 | 0.20  | 0.32  |
| 2-Methylpropanoic acid                    | 6.48-32    | 0.33 | -0.89 | 0.9891 | 4.05  | 5.76  |
| 3-Methylbutanoic acid                     | 2.69-13.4  | 0.41 | -1.07 | 0.9868 | 0.00  | 0.00  |
| 2-Methylbutanoic acid                     | 5.32-26.6  | 0.51 | -2.37 | 0.9924 | 5.88  | 7.89  |
| Methional                                 | 2.04-25.5  | 0.37 | -0.75 | 0.9917 | 2.41  | 2.76  |
| Benzaldehyde                              | 0.94-9.4   | 0.82 | -0.74 | 0.9053 | 1.97  | 3.86  |
| Phenylethyl alcohol                       | 2.65-26.5  | 0.80 | -2.97 | 0.9892 | 4.06  | 4.43  |
| <i>Esterase activity</i>                  |            |      |       |        |       |       |
| Ethyl acetate                             | 1.9-19     | 0.37 | 0.02  | 0.997  | 0.00  | 0.00  |
| Methyl hexanoate                          | 2.08-10.4  | 0.26 | -0.16 | 0.9929 | 0.00  | 0.00  |
| Ethyl hexanoate                           | 4-100      | 0.36 | -1.90 | 0.9948 | 0.00  | 0.00  |
| Ethyl octanoate                           | 6.64-415   | 0.44 | -5.10 | 0.9985 | 12.50 | 13.21 |
| Ethyl decanoate                           | 2.4-48     | 0.70 | -1.84 | 0.9968 | 0.00  | 0.00  |
| Ethyl dodecanoate                         | 5.3-106    | 0.24 | -1.44 | 0.9976 | 0.00  | 0.00  |
| <i>Lipid <math>\beta</math>-oxidation</i> |            |      |       |        |       |       |
| 2-Pentanone                               | 1.32-66    | 0.48 | -0.24 | 0.9978 | 0.00  | 0.00  |
| 2-Heptanone                               | 1.2-30     | 0.49 | -0.68 | 0.9986 | 2.36  | 3.78  |
| 1-Octen-3-ol                              | 2.48-31    | 0.85 | -1.84 | 0.9965 | 0.00  | 0.00  |
| <i>Unknown origin</i>                     |            |      |       |        |       |       |
| <i>p</i> -Xylene                          | 0.82-8.2   | 0.32 | -0.04 | 0.9884 | 0.00  | 0.00  |
| Styrene                                   | 0.52-5.2   | 0.58 | -0.29 | 0.9938 | 0.87  | 1.35  |

<sup>a</sup> Target ion (m/z) used to quantify the compound.

**Table S4.** Quantification (ng/g) of volatile compounds in the headspace of model systems.

| Group                          | Times (days) | Ethanol | Acetone         | 2-Butanone     | Acetic acid | 3-Hydroxy-2-butanone | Butanoic acid | Carbohydrate fermentation<br>(excluding ethanol) |      |      |       |      |       |       |    |
|--------------------------------|--------------|---------|-----------------|----------------|-------------|----------------------|---------------|--------------------------------------------------|------|------|-------|------|-------|-------|----|
| C <sup>a</sup>                 | 0            | 1972.84 | ab <sup>d</sup> | - <sup>e</sup> | -           | -                    | -             | -                                                | -    |      |       |      |       |       |    |
|                                | 7            | 1896.25 | abc             | 4.64           | ab          | -                    | -             | -                                                | -    | 4.64 | de    |      |       |       |    |
|                                | 14           | 1797.97 | abcd            | 5.44           | a           | -                    | 1.13          | fg                                               | -    | 6.57 | d     |      |       |       |    |
|                                | 28           | 1504.81 | cde             | 4.68           | ab          | -                    | 1.17          | fg                                               | -    | 5.85 | de    |      |       |       |    |
|                                | 39           | 1067.24 | fgh             | 3.35           | de          | -                    | 1.15          | fg                                               | -    | 4.50 | de    |      |       |       |    |
| PL                             | 0            | 2127.34 | a               | -              | 2.28        | c                    | 1.16          | fg                                               | -    | 3.44 | de    |      |       |       |    |
|                                | 7            | 1944.64 | ab              | 4.78           | ab          | 1.08                 | c             | 1.17                                             | fg   | -    | 7.02  | d    |       |       |    |
|                                | 14           | 1777.99 | abcd            | 1.30           | f           | 0.59                 | c             | 1.13                                             | fg   | -    | 3.02  | de   |       |       |    |
|                                | 28           | 1452.55 | def             | 5.30           | ab          | -                    | 1.18          | fg                                               | -    | 6.49 | de    |      |       |       |    |
|                                | 39           | 798.75  | ghi             | 3.29           | de          | -                    | 1.37          | fg                                               | -    | 4.66 | de    |      |       |       |    |
| VO                             | 0            | 1635.58 | bcd             | -              | 1.17        | c                    | -             | -                                                | -    | 1.17 | de    |      |       |       |    |
|                                | 7            | 1436.30 | def             | 4.26           | bcd         | 0.30                 | c             | 1.18                                             | fg   | -    | 5.75  | de   |       |       |    |
|                                | 14           | 1417.96 | def             | 5.23           | ab          | 0.13                 | c             | 1.14                                             | fg   | -    | 6.51  | d    |       |       |    |
|                                | 28           | 1125.76 | efg             | 4.50           | abc         | -                    | 1.22          | fg                                               | -    | 5.71 | de    |      |       |       |    |
|                                | 39           | 416.63  | ij              | 2.82           | e           | -                    | 6.58          | abcd                                             | 4.32 | c    | 13.72 | c    |       |       |    |
| PLY                            | 0            | 820.99  | ghi             | 3.57           | cde         | 10.27                | b             | 1.58                                             | fg   | -    | 15.42 | c    |       |       |    |
|                                | 7            | 589.19  | i               | 4.51           | abc         | 11.79                | b             | 3.16                                             | ef   | 4.36 | bc    | -    | 23.83 | b     |    |
|                                | 14           | 625.11  | i               | 5.47           | a           | 21.26                | a             | 4.39                                             | de   | 4.78 | abc   | -    | 35.89 | a     |    |
|                                | 28           | 517.15  | ij              | 4.56           | abc         | 0.49                 | c             | 9.00                                             | a    | 5.15 | ab    | -    | 19.20 | bc    |    |
|                                | 39           | 161.43  | j               | 2.88           | e           | -                    | 6.05          | bcd                                              | 5.28 | a    | 0.96  | a    | 15.17 | c     |    |
| VOY                            | 0            | 673.61  | hi              | 3.03           | e           | 0.71                 | c             | 1.57                                             | fg   | -    | -     | 5.31 | de    |       |    |
|                                | 7            | 683.71  | hi              | 4.99           | ab          | 0.29                 | c             | 7.88                                             | ab   | 4.69 | abc   | 1.05 | a     | 18.90 | bc |
|                                | 14           | 647.55  | i               | 5.47           | a           | 0.09                 | c             | 5.25                                             | cde  | 4.67 | abc   | 0.93 | a     | 16.41 | c  |
|                                | 28           | 590.91  | i               | 4.84           | ab          | -                    | 7.12          | abc                                              | 4.25 | c    | 1.02  | a    | 17.22 | c     |    |
|                                | 39           | 687.08  | hi              | 2.95           | e           | -                    | 1.46          | fg                                               | -    | -    | -     | 4.41 | de    |       |    |
| RMSE <sup>b</sup>              |              | 132.35  | 0.33            | 1.88           | 0.78        | 0.26                 | 0.05          | 2.05                                             |      |      |       |      |       |       |    |
| P <sub>g</sub> <sup>c</sup>    |              | ***     | ***             | ***            | ***         | ***                  | ***           | ***                                              |      |      |       |      |       |       |    |
| P <sub>t</sub> <sup>c</sup>    |              | ***     | ***             | ***            | ***         | ***                  | ***           | ***                                              |      |      |       |      |       |       |    |
| P <sub>g</sub> *t <sup>c</sup> |              | ***     | ***             | ***            | ***         | ***                  | ***           | ***                                              |      |      |       |      |       |       |    |





[illegible]

[illegible]

| Group                         | Times (days) | 3-Methylbutanoic acid |    | 2-Methylbutanoic acid |    | Methional |    | Benzaldehyde |     | Phenylethyl Alcohol |    | Amino acid degradation |      |
|-------------------------------|--------------|-----------------------|----|-----------------------|----|-----------|----|--------------|-----|---------------------|----|------------------------|------|
| C <sup>a</sup>                | 0            | -                     |    | -                     |    | -         |    | -            |     | -                   |    | -                      |      |
|                               | 7            | -                     |    | -                     |    | -         |    | -            |     | -                   |    | 0.32                   | m    |
|                               | 14           | -                     |    | -                     |    | -         |    | 0.32         | e   | -                   |    | 3.67                   | hij  |
|                               | 28           | -                     |    | -                     |    | 0.48      | e  | 0.72         | bc  | -                   |    | 5.17                   | fgh  |
|                               | 39           | -                     |    | -                     |    | 0.56      | de | 1.11         | a   | -                   |    | 4.57                   | fghi |
| PL                            | 0            | -                     |    | -                     |    | -         |    | -            |     | -                   |    | 0.00                   | m    |
|                               | 7            | -                     |    | -                     |    | -         |    | -            |     | -                   |    | 0.64                   | m    |
|                               | 14           | -                     |    | -                     |    | -         |    | 0.31         | e   | -                   |    | 1.73                   | klm  |
|                               | 28           | -                     |    | -                     |    | 0.70      | bc | 0.69         | bc  | -                   |    | 7.45                   | de   |
|                               | 39           | -                     |    | -                     |    | 1.13      | a  | 0.91         | ab  | -                   |    | 5.65                   | efg  |
| VO                            | 0            | -                     |    | -                     |    | -         |    | -            |     | -                   |    | 0.94                   | lm   |
|                               | 7            | -                     |    | -                     |    | -         |    | -            |     | -                   |    | 1.05                   | lm   |
|                               | 14           | -                     |    | -                     |    | -         |    | -            |     | -                   |    | 1.42                   | klm  |
|                               | 28           | -                     |    | -                     |    | -         |    | 0.41         | de  | -                   |    | 2.57                   | jkl  |
|                               | 39           | -                     |    | -                     |    | -         |    | 0.55         | cde | -                   |    | 3.19                   | ijk  |
| PLY                           | 0            | -                     |    | -                     |    | -         |    | -            |     | -                   |    | 4.29                   | ghij |
|                               | 7            | 0.77                  | ab | 1.14                  | b  | -         |    | -            |     | 0.94                | a  | 10.82                  | b    |
|                               | 14           | 0.75                  | ab | 1.16                  | ab | -         |    | -            |     | 0.87                | bc | 10.25                  | b    |
|                               | 28           | 0.83                  | ab | 1.20                  | ab | 0.64      | cd | 0.61         | cd  | 0.90                | ab | 14.65                  | a    |
|                               | 39           | 0.98                  | a  | 1.49                  | a  | 0.83      | b  | 0.75         | bc  | 0.94                | d  | 9.76                   | bc   |
| VOY                           | 0            | -                     |    | -                     |    | -         |    | -            |     | 0.83                | c  | 6.13                   | ef   |
|                               | 7            | 0.62                  | b  | -                     |    | -         |    | -            |     | 0.91                | ab | 8.04                   | cd   |
|                               | 14           | 0.61                  | b  | -                     |    | -         |    | -            |     | 0.87                | bc | 6.35                   | def  |
|                               | 28           | 0.58                  | b  | -                     |    | -         |    | 0.40         | de  | -                   |    | 5.87                   | efg  |
|                               | 39           | -                     |    | -                     |    | 0.50      | e  | 0.64         | cd  | -                   |    | 1.67                   | klm  |
| RMSE <sup>b</sup>             |              | 0.08                  |    | 0.11                  |    | 0.04      |    | 0.08         |     | 0.02                |    | 0.58                   |      |
| Pg <sup>c</sup>               |              | ***                   |    | ***                   |    | ***       |    | ***          |     | ***                 |    | ***                    |      |
| Pt <sup>c</sup>               |              | ***                   |    | ***                   |    | ***       |    | ***          |     | ***                 |    | ***                    |      |
| Pg <sup>*t</sup> <sup>c</sup> |              | ***                   |    | ***                   |    | ***       |    | ***          |     | ***                 |    | ***                    |      |



| Group                           | Times (days) | 2-Pentanone |    | 2-Heptanone |     | 1-Octen-3-ol |   | Lipid $\beta$ -oxidation |      | <i>p</i> -Xylene |       | Styrene |       | Unknown |       |
|---------------------------------|--------------|-------------|----|-------------|-----|--------------|---|--------------------------|------|------------------|-------|---------|-------|---------|-------|
| C <sup>a</sup>                  | 0            | -           |    | -           |     | 1.83         | a | 1.83                     | def  | 0.45             | ab    | 1.57    | a     | 2.02    | a     |
|                                 | 7            | -           |    | 0.45        | efg | 1.39         | b | 1.84                     | def  | 0.14             | fgh   | 0.29    | bcdef | 0.43    | efg   |
|                                 | 14           | -           |    | 0.71        | def | 1.90         | a | 2.61                     | cd   | 0.13             | gh    | 0.41    | bcdef | 0.54    | cdefg |
|                                 | 28           | -           |    | 0.52        | ef  | 1.43         | b | 1.95                     | cde  | -                |       | 0.29    | cdef  | 0.29    | fg    |
|                                 | 39           | -           |    | 0.37        | fg  | 1.17         | b | 1.54                     | def  | -                |       | 0.15    | f     | 0.15    | g     |
| PL                              | 0            | -           |    | -           |     | 0.56         | c | 0.56                     | fg   | -                |       | 0.52    | bcdef | 0.52    | defg  |
|                                 | 7            | -           |    | -           |     | 0.63         | c | 0.63                     | efg  | -                |       | 0.33    | bcdef | 0.33    | fg    |
|                                 | 14           | -           |    | 0.64        | def | 0.65         | c | 1.30                     | defg | -                |       | 0.57    | bcdef | 0.57    | cdefg |
|                                 | 28           | -           |    | 0.44        | efg | 0.68         | c | 1.12                     | efg  | 0.26             | cdefg | 0.44    | bcdef | 0.70    | bcdef |
|                                 | 39           | -           |    | -           |     | 0.63         | c | 0.63                     | efg  | 0.20             | efg   | 0.36    | bcdef | 0.56    | cdefg |
| VO                              | 0            | -           |    | 1.61        | ab  | -            |   | 1.61                     | def  | 0.54             | a     | 0.32    | bcdef | 0.86    | bcde  |
|                                 | 7            | -           |    | 1.12        | bcd | -            |   | 1.12                     | efg  | 0.39             | abc   | 0.22    | def   | 0.61    | bcdef |
|                                 | 14           | -           |    | 0.88        | de  | -            |   | 0.88                     | efg  | 0.19             | efg   | 0.14    | f     | 0.34    | fg    |
|                                 | 28           | -           |    | 0.91        | de  | 0.61         | c | 1.52                     | def  | 0.15             | fgh   | 0.14    | f     | 0.30    | fg    |
|                                 | 39           | -           |    | 1.10        | cd  | 0.50         | c | 1.60                     | def  | 0.15             | fgh   | 0.13    | f     | 0.28    | fg    |
| PLY                             | 0            | -           |    | -           |     | -            |   | -                        |      | 0.31             | bcdef | 0.67    | bc    | 0.98    | bc    |
|                                 | 7            | 0.52        | cd | -           |     | 0.67         | c | 1.19                     | efg  | 0.16             | fgh   | 0.27    | def   | 0.43    | efg   |
|                                 | 14           | 0.55        | cd | 0.57        | ef  | 0.69         | c | 1.81                     | def  | 0.33             | bcde  | 0.62    | bcd   | 0.95    | bcd   |
|                                 | 28           | 0.42        | cd | 0.74        | def | 0.73         | c | 1.90                     | def  | 0.37             | bcd   | 0.69    | b     | 1.06    | b     |
|                                 | 39           | -           |    | 0.45        | efg | 0.66         | c | 1.11                     | efg  | 0.22             | defg  | 0.43    | bcdef | 0.65    | bcdef |
| VOY                             | 0            | 0.43        | cd | 1.50        | abc | -            |   | 1.94                     | cde  | 0.20             | efg   | 0.17    | ef    | 0.37    | fg    |
|                                 | 7            | 9.23        | a  | 1.91        | a   | -            |   | 11.15                    | a    | 0.15             | fgh   | 0.15    | f     | 0.30    | fg    |
|                                 | 14           | 3.69        | b  | 1.50        | abc | -            |   | 5.19                     | b    | 0.19             | efg   | 0.14    | f     | 0.33    | fg    |
|                                 | 28           | 1.18        | c  | 1.48        | abc | 0.61         | c | 3.27                     | c    | 0.35             | bcde  | 0.18    | ef    | 0.53    | defg  |
|                                 | 39           | -           |    | 0.69        | def | 0.61         | c | 1.30                     | defg | 0.20             | efg   | 0.16    | f     | 0.36    | fg    |
| RMSE <sup>b</sup>               |              | 0.30        |    | 0.16        |     | 0.09         |   | 0.43                     |      | 0.05             |       | 0.12    |       | 0.14    |       |
| <i>Pg</i> <sup>c</sup>          |              | ***         |    | ***         |     | ***          |   | ***                      |      | ***              |       | ***     |       | ***     |       |
| <i>Pt</i> <sup>c</sup>          |              | ***         |    | ***         |     | ***          |   | ***                      |      | ***              |       | ***     |       | ***     |       |
| <i>Pg*<i>t</i></i> <sup>c</sup> |              | ***         |    | ***         |     | ***          |   | ***                      |      | ***              |       | ***     |       | ***     |       |

<sup>a</sup> C: Control meat model system; PL and VO: pork lard and coconut oil meat model systems, respectively; PLY and VOY: pork lard and coconut oil meat model systems with inoculated yeast.

<sup>b</sup>RMSE: root mean square error.

<sup>c</sup>*P* value of group (g), ripening time (t) and group and ripening time (g\*t) effect at \*\*\*:  $P < 0.001$ , \*\*:  $P < 0.01$ , \*:  $P < 0.05$ , ns:  $P > 0.05$ .

<sup>d</sup>Different letters in columns indicate significant differences at  $P < 0.05$ .

<sup>e</sup> -: not detected

**Table S5.** Odor descriptor and OAVs values of volatile compounds in the model systems at 39 days.

| Compounds                        | Odor descriptor <sup>a</sup>      | Threshold in air (ng/g) <sup>b</sup> | Meat model systems <sup>d</sup> |       |        |       |        |
|----------------------------------|-----------------------------------|--------------------------------------|---------------------------------|-------|--------|-------|--------|
|                                  |                                   |                                      | C                               | PL    | VO     | PLY   | VOY    |
| <i>Carbohydrate fermentation</i> |                                   |                                      |                                 |       |        |       |        |
| Ethanol                          | Alcoholic                         | 170–76000000                         | 6.3                             | 4.7   | 2.5    | <1    | 4.0    |
| Acetone                          | Solvent                           | 1100-27900000                        | <1                              | <1    | <1     | <1    | <1     |
| 2-Butanone                       | Fruity, green                     | 750-1000000                          | <1                              | <1    | <1     | <1    | <1     |
| Acetic acid                      | Pungent, sour, fruit              | 10-500000                            | <1                              | <1    | <1     | <1    | <1     |
| 3-Hydroxy-2-butanone             | Creamy, dairy, sweet              | 14-10000 <sup>c</sup>                | <1                              | <1    | <1     | <1    | <1     |
| Butanoic acid                    | Acidic, sour, cheesy              | 0.35-9000                            | <1                              | <1    | <1     | 2.8   | <1     |
| <i>Lipid oxidation</i>           |                                   |                                      |                                 |       |        |       |        |
| 1-Pentanol                       | Pungent, fermented, bready        | 20-1100000                           | <1                              | <1    | <1     | <1    | <1     |
| Hexanal                          | Green, woody, vegetable           | 0.82-84500                           | 28.1                            | 4.1   | 39.7   | 2.1   | 47.3   |
| 1-Hexanol                        | Green, fruity, apple              | 10-65000                             | <1                              | <1    | <1     | <1    | <1     |
| Heptanal                         | Green, aldehydic, oily            | 0.85-9500                            | <1                              | <1    | 1.0    | <1    | 1.0    |
| 2-Pentylfuran                    | Green, waxy, musty                | 19-270                               | <1                              | <1    | <1     | <1    | <1     |
| Octanal                          | Aldehydic, green, peely           | 0.88-5000                            | 1.4                             | 1.4   | 1.6    | 1.1   | 2.4    |
| Hexanoic acid                    | Cheesy, fruity, phenolic          | 2.9-3500                             | 1.2                             | 1.2   | 24.1   | 1.2   | 22.9   |
| 2-Ethyl-1-hexanol                | Sweet, fatty, fruity              | 198-25482.2                          | <1                              | <1    | <1     | <1    | <1     |
| 1-Octanol                        | Green, citrus, orange             | 5-9000                               | <1                              | <1    | <1     | <1    | <1     |
| Nonanal                          | Aldehydic, citrus, cucumber       | 0.3-230                              | 4.9                             | 6.7   | 5.7    | 5.2   | 5.9    |
| Nonanoic acid                    | Cheesy, sweet, creamy             | 1.6-120                              | <1                              | <1    | <1     | <1    | <1     |
| Octanoic acid                    | Rancid, soapy, cheesy             | 0.065-3200                           | 156.6                           | 157.7 | 4893.2 | 161.5 | 4667.4 |
| n-Decanoic acid                  | Soapy, waxy, fruity               | 50-90                                | <1                              | <1    | <1     | <1    | <1     |
| Dodecanoic acid                  | Fatty, coconut, bay               | 0.4-100                              | <1                              | <1    | 43.6   | <1    | 42.4   |
| <i>Amino acid degradation</i>    |                                   |                                      |                                 |       |        |       |        |
| 2-Methylpropanal                 | Fresh, aldehydic, floral, pungent | 1-410                                | <1                              | <1    | <1     | <1    | <1     |

|                                           |                                   |                    |     |      |      |      |      |
|-------------------------------------------|-----------------------------------|--------------------|-----|------|------|------|------|
| 3-Methylbutanal                           | Fruity, dry, green, cocoa         | 0.35-6             | 3.8 | 5.8  | 3.8  | 5.1  | 1.5  |
| 2-Methylbutanal                           | Musty, rummy, nutty               | 100                | <1  | <1   | <1   | <1   | <1   |
| Dimethyl disulfide                        | Sulfurous, cabbage, malty, creamy | 1.1-5600           | <1  | <1   | <1   | <1   | <1   |
| 3-Methyl-1-butanol                        | Fusel, fermented, fruity          | 19-6300            | <1  | <1   | <1   | <1   | <1   |
| 2-Methylbutanol                           | Ethereal fresh                    | 140-329000         | <1  | <1   | <1   | <1   | <1   |
| 2-Methylpropanoic acid                    | Acidic, sour, cheesy              | 5-240              | <1  | <1   | <1   | <1   | <1   |
| 3-Methylbutanoic acid                     | Cheesy, dairy, acidic, sour       | 0.22-3000          | <1  | <1   | <1   | 4.4  | <1   |
| 2-Methylbutanoic acid                     | Fruity, dirty, acidic             | 20                 | <1  | <1   | <1   | <1   | <1   |
| Methional                                 | Musty, tomato, potato             | 0.063-60           | 8.9 | 18.0 | <1   | 13.2 | 7.9  |
| Benzaldehyde                              | Sharp, sweet, bitter              | 10-3400000         | <1  | <1   | <1   | <1   | <1   |
| Phenylethyl alcohol                       | Sweet, floral, fresh              | 0.35-3800          | <1  | <1   | <1   | 2.7  | <1   |
| <i>Esterase activity</i>                  |                                   |                    |     |      |      |      |      |
| Ethyl acetate                             | Ethereal, fruity, sweet           | 340-1120000        | <1  | <1   | <1   | <1   | <1   |
| Methyl hexanoate                          | Ethereal, fruity, pineapple       | 39-87 <sup>c</sup> | <1  | <1   | <1   | <1   | <1   |
| Ethyl hexanoate                           | Sweet, fruity, pineapple          | 3-18100            | <1  | <1   | 1.7  | <1   | 2.9  |
| Ethyl octanoate                           | Fruity, winey, waxy, sweet        | 2-40               | 1.3 | 1.4  | 10.6 | 1.3  | 26.7 |
| Ethyl decanoate                           | Sweet, waxy, fruity, apple        | 1.2-530            | <1  | <1   | 1.8  | <1   | 2.7  |
| Ethyl dodecanoate                         | Sweet, waxy, floral, soapy        | 2                  | <1  | <1   | 1.8  | <1   | 2.2  |
| <i>Lipid <math>\beta</math>-oxidation</i> |                                   |                    |     |      |      |      |      |
| 2-Pentanone                               | Sweet, fruity, ethereal, winey    | 98-230000          | <1  | <1   | <1   | <1   | <1   |
| 2-Heptanone                               | Cheesy, fruity, ketonic, green    | 3.5-330            | <1  | <1   | <1   | <1   | <1   |
| 1-Octen-3-ol                              | Mushroom, earthy, green           | 1-110              | 1.2 | <1   | <1   | <1   | <1   |
| <i>Unknown origin</i>                     |                                   |                    |     |      |      |      |      |
| <i>p</i> -Xylene                          |                                   | 250-9100           | <1  | <1   | <1   | <1   | <1   |
| Styrene                                   | Sweet, balsamic, floral           | 12-258000          | <1  | <1   | <1   | <1   | <1   |

<sup>a</sup> Odor descriptors from The Good Scents Company database ([www.thegoodscentscompany.com](http://www.thegoodscentscompany.com)).

<sup>b</sup> Threshold values in air obtained from Van Gemert (2011).

<sup>c</sup> Threshold values in water obtained from Van Gemert (2011).



<sup>d</sup> C: Control meat model system; PL and VO: pork lard and coconut oil meat model systems, respectively; PLY and VOY: pork lard and coconut oil meat model systems with inoculated yeast.
